# Supplementary material for: The role of Central American barriers in shaping the evolutionary history of the northernmost glassfrog, Hyalinobatrachium fleischmanni (Anura: Centrolenidae)
Source: PeerJ journal article supplement (doi:10.7717/peerj.6115), 2019-01-03

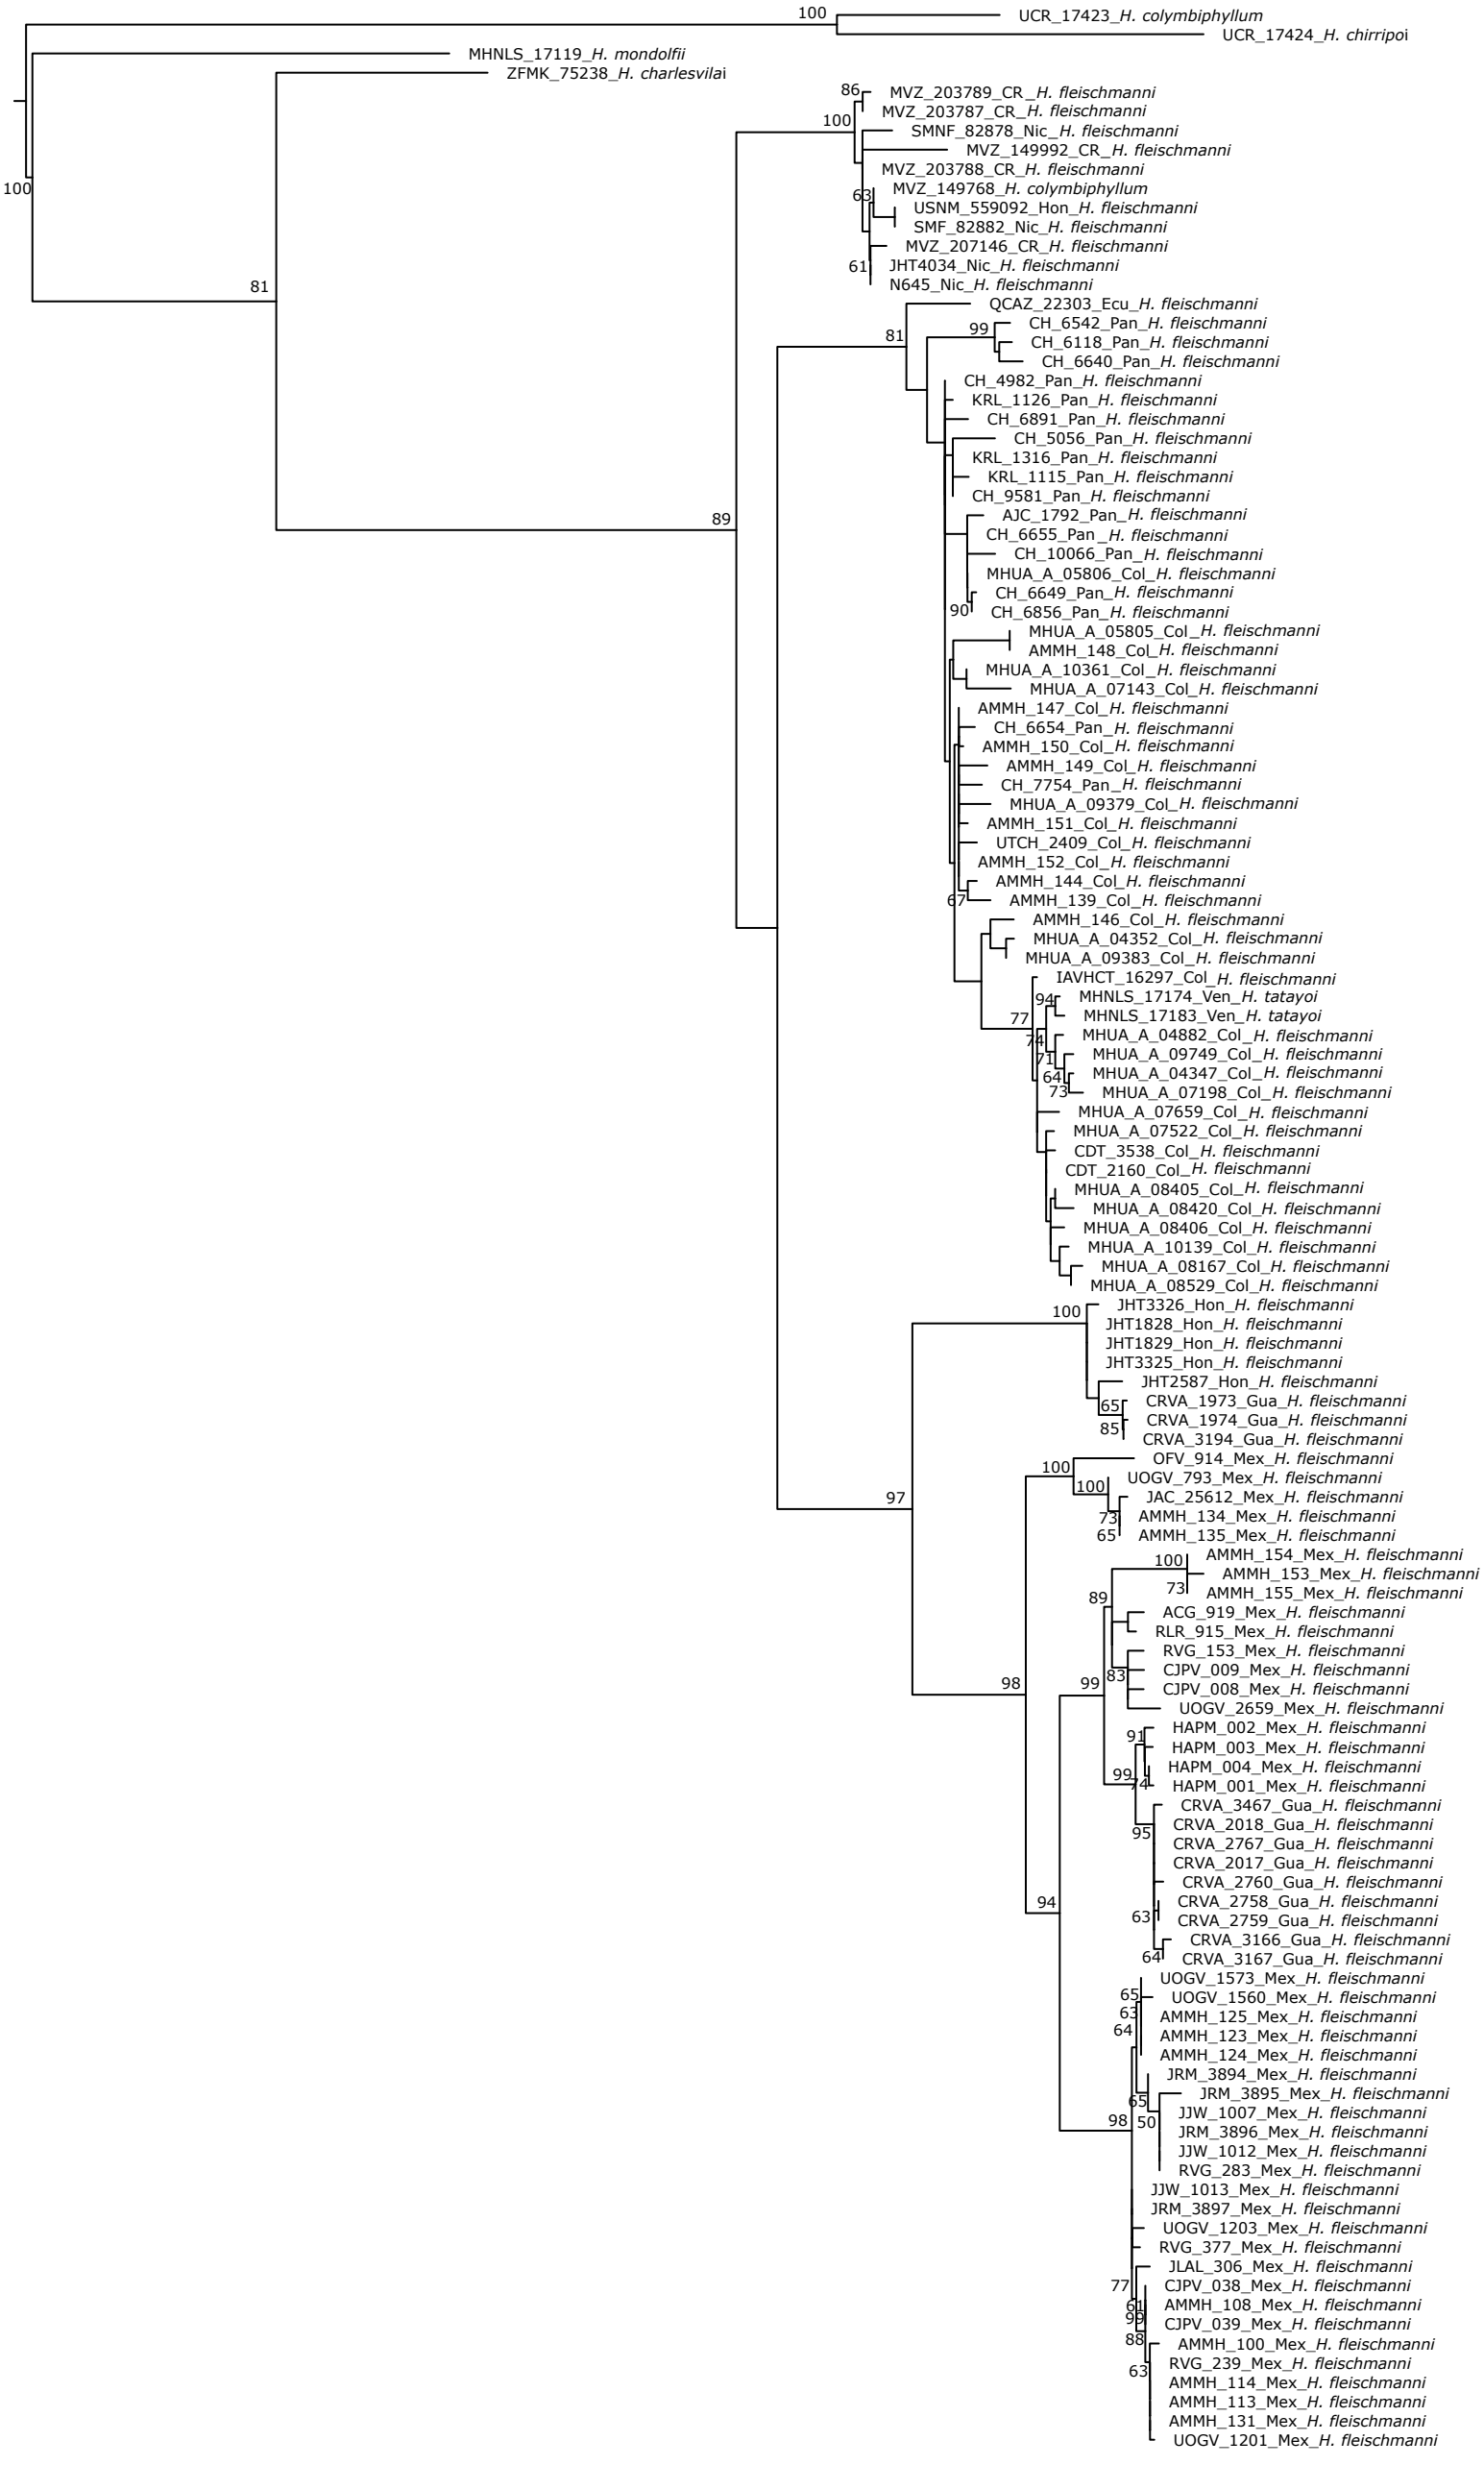

Supplement: Supplementary_Fig_1_6oct.pdf [file Supplementary_Fig_1_6oct.pdf]
