# Supplementary material for: The role of Central American barriers in shaping the evolutionary history of the northernmost glassfrog, Hyalinobatrachium fleischmanni (Anura: Centrolenidae)
Source: PeerJ. 2019 Jan 3;7:e6115. doi: 10.7717/peerj.6115 (PMC6321759; doi:10.7717/peerj.6115)
Supplement: Table S1 — Specimens and DNA sequences used in this research. Museum voucher, GenBank accession numbers and data sources are specified. GenBank numbers in bold correspond to numbers taken from previously published sources. Museum abbreviations are CD (Colección de Vertebrados de Docencia de la Universidad del Valle), CH (Círculo Herpetológico de Panamá), IAVH-Am (Colección de Anfibios del Instituto de Investigación de Recursos Biológicos Alexander von Humboldt), MHNLS (Museo de Historia Natural La Salle), MHUA (Museo de Herpetología Universidad de Antioquia), MVZ (Museum of Vertebrate Zoology, University of California at Berkeley), MZFC (Museo de Zoología de la Facultad de Ciencias), QCAZ (Museum of Zoology at Catholic University of Ecuador), SMNF (Senckenberg Museum, Frankfurt), UF (Florida Museum of Natural History), UCR (Colección de Herpetología, Universidad de Costa Rica). Abbreviations for field series of individuals are as follow: AJC (Andrew J. Crawford), AMMH (Angela M. Mendoza), CRVA (Carlos R. Vázquez- Almazán), JAC (Jonathan A. Campbell), KRL (Karen R. Lips), RLR (Roberto Luna-Reyes), RVG (Rodrigo Villegas García), UOGV (Uri O. García-Vazquez). [file peerj-07-6115-s006.xlsx]

## Sheet: DataBase
Number	Specimen Voucher	Species	Country	State	Municipality	Locality	Elevation provided by source	Latitude	Longitude	Genbank Codes
										16S	Source	COI	Source	ND1	Source
1	MZFC_30406	H. flesichmanni	Mexico	Tabasco		Northern foothills of Cerro Las Flores, road to Ejido Francisco J. Mujica, 5.70 road km WSW of Mex-145 intersection, then upstream along tributary of Río Pedregal		17.3741	-93.6471	MG944551	a	MG944443	a	---	---
2	AJC_1792	H. flesichmanni	Panama	Panama	Distrito de Chilibre	Urbanizacion de los Altos de Cerro Azul		9.168	-79.414	KR863260	d	KR863005	d	---	---
3	AMMH_100	H. flesichmanni	Mexico	Veracruz	Teocelo	Puente	1120	19.4036	-96.9867	MG944552	a	MG944444	a	MG944644	a
4	AMMH_108	H. flesichmanni	Mexico	Veracruz	Xico	Cafetal la Onza	1144	19.4335	-96.9645	MG944553	a	MG944445	a	MG944645	a
5	AMMH_113	H. flesichmanni	Mexico	Veracruz	Xico	Cafetal la Onza	1144	19.4335	-96.9645	MG944554	a	MG944446	a	---	---
6	AMMH_114	H. flesichmanni	Mexico	Veracruz	Xico	Cafetal la Onza	1144	19.4335	-96.9645	MG944555	a	MG944447	a	---	---
7	AMMH_123	H. flesichmanni	Mexico	Veracruz	Naranjal	UMA Tequecholapa	691	18.7998	-96.9521	MG944556	a	MG944448	a	---	---
8	AMMH_124	H. flesichmanni	Mexico	Veracruz	Naranjal	UMA Tequecholapa	691	18.7998	-96.9521	MG944557	a	MG944449	a	---	---
9	AMMH_125	H. flesichmanni	Mexico	Veracruz	Naranjal	UMA Tequecholapa	691	18.7998	-96.9521	MG944558	a	MG944450	a	---	---
10	AMMH_131	H. flesichmanni	Mexico	Veracruz	Naranjal	UMA Tequecholapa	691	18.7998	-96.9521	MG944559	a	MG944451	a	---	---
11	AMMH_134	H. flesichmanni	Mexico	Guerrero						MG944560	a	MG944452	a	---	---
12	AMMH_135	H. flesichmanni	Mexico	Guerrero						MG944561	a	MG944453	a	MG944646	a
13	IAvH-Am-14757	H. flesichmanni	Colombia	Valle del Cauca	Buenaventura	Corregimiento Danubio, Vereda el Cauchal	272	3.60256	-76.8641	MG944562	a	MG944454	a	MG944647	a
14	IAvH-Am-14762	H. flesichmanni	Colombia	Valle del Cauca	Buenaventura	Corregimiento Danubio, Vereda el Cauchal	272	3.60256	-76.8641	MG944563	a	MG944455	a	MG944648	a
15	IAvH-Am-14764	H. flesichmanni	Colombia	Choco	Lloró	La granja, UTCH	112	5.51035	-76.5548	MG944564	a	MG944456	a	MG944649	a
16	IAvH-Am-14765	H. flesichmanni	Colombia	Choco	Lloró	La granja, UTCH	112	5.51035	-76.5548	MG944565	a	MG944457	a	---	---
17	IAvH-Am-14766	H. flesichmanni	Colombia	Choco	Lloró	La granja, UTCH	112	5.51035	-76.5548	MG944566	a	MG944458	a	MG944650	a
18	IAvH-Am-14767	H. flesichmanni	Colombia	Choco	Capurgana	Quebrada la Dorada	48	8.62148	-77.3616	MG944567	a	MG944459	a	MG944651	a
19	IAvH-Am-14768	H. flesichmanni	Colombia	Choco	Capurgana	Quebrada la Dorada	48	8.62148	-77.3616	MG944568	a	MG944460	a	MG944652	a
20	IAvH-Am-14769	H. flesichmanni	Colombia	Choco	Capurgana	Quebrada la Dorada	48	8.62148	-77.3616	MG944569	a	MG944461	a	MG944653	a
21	IAvH-Am-14770	H. flesichmanni	Colombia	Choco	Capurgana	Quebrada la Dorada	48	8.62148	-77.3616	MG944570	a	MG944462	a	MG944654	a
22	AMMH_159	H. flesichmanni	Mexico	Chiapas	Escuintla	Cafetal en Ejido Banderas	1144	15.3234	-92.4776	MG944571	a	MG944463	a	MG944655	a
23	AMMH_160	H. flesichmanni	Mexico	Chiapas	Escuintla	Cafetal en Ejido Banderas	1144	15.3234	-92.4776	MG944572	a	MG944464	a	MG944656	a
24	AMMH_161	H. flesichmanni	Mexico	Chiapas	Escuintla	Cafetal en Ejido Banderas	1144	15.3234	-92.4776	MG944573	a	MG944465	a	---	---
25	CDT_2160	H. flesichmanni	Colombia	Caldas	La Dorada	hacienda La Española, Guarinosito		5.38505	-74.7702	MG944574	a	MG944466	a	MG944657	a
26	CDT_3538	H. flesichmanni	Colombia	Caldas	La Dorada	La Miel		5.67381	-74.7399	MG944575	a	MG944467	a	MG944658	a
27	CH_10066	H. flesichmanni	Panama	Panamá		Centro Cristo Misionero (Padre Wally's), Carretera Panamericana, Wacuco, Corregimiento Torti		8.96367	-78.4573	MG944576	a	MG944468	a	MG944659	a
28	CH_4982	H. flesichmanni	Panama	Coclé		márgenes de Río Indio Arriba (cabecera)		8.76322	-80.1496	MG944577	a	MG944469	a	---	---
29	CH_5056	H. flesichmanni	Panama	Coclé		Río Cascajal, Cascajal		8.81867	-80.5419	MG944578	a	MG944470	a	---	---
30	CH_6118	H. flesichmanni	Panama	Bocas del Toro		Guayabal, quebrada pequeña, cerca del campamento, Río Changuinola		9.14183	-82.5015	MG944579	a	MG944471	a	MG944660	a
31	CH_6542	H. flesichmanni	Panama	Bocas del Toro		Finca de Enrique Quintero, Frente a Boca de Río Culubre, Río Changuinola	1	9.14183	-82.5015	MG944580	a	MG944472	a	MG944661	a
32	CH_6640	H. flesichmanni	Panama	Bocas del Toro		Charco La Pava, Quebrada Mumani, Río Changuinola	170	9.23344	-82.5	MG944581	a	MG944473	a	MG944662	a
33	CH_6649	H. flesichmanni	Panama	Panama	Distrito de Chilibre	Urbanizacion de los Altos de Cerro Azul		9.168	-79.414	KR863267	d	KR863012	d	MG944663	a
34	CH_6654	H. flesichmanni	Panama	Panama	Distrito de Chilibre	Urbanizacion de los Altos de Cerro Azul		9.168	-79.414	KR863266	d	KR863011	d	---	---
35	CH_6655	H. flesichmanni	Panama	Panama	Distrito de Chilibre	Urbanizacion de los Altos de Cerro Azul		9.168	-79.414	KR863264	d	KR863009	d	---	---
36	CH_6856	H. flesichmanni	Panama	Panama	Distrito de Panama	Estacion Rio Chico de la ACP, Rio Chagres sur, arr		9.265	-79.508	KR863265	d	KR863010	d	MG944664	a
37	CH_6891	H. flesichmanni	Panama	Colón		Rio Frijoles, Parque Nacional Soberanía.		9.14915	-79.6059	---	---	MG944474	a	---	---
38	CH_7754	H. flesichmanni	Panama	Comarca Wargandí		Nurra	1	9.01091	-78.0547	MG944582	a	MG944475	a	MG944665	a
39	CH_9581	H. flesichmanni	Panama	Coclé		Churuquita Grande		8.60105	-80.2693	---	---	MG944476	a	---	---
40	MZFC_30403	H. flesichmanni	Mexico	Tabasco	Huimanguillo	Camino hacia Ejido Francisco J. Mujica, 1.5 km al NE del pueblo	280	17.3856	-93.6421	MG944583	a	MG944477	a	---	---
41	MZFC_30404	H. flesichmanni	Mexico	Tabasco	Huimanguillo	Camino hacia Ejido Francisco J. Mujica, 1.5 km al NE del pueblo	280	17.3856	-93.6421	MG944584	a	MG944478	a	---	---
42	MZFC_30103	H. flesichmanni	Mexico	Puebla	Eloxochitlán	Xonotipan de Juárez, Carr. Azumbilla-Tlacotepec de Díaz	777	18.4917	-96.8972	MG944585	a	MG944479	a	MG944666	a
43	MZFC_30104	H. flesichmanni	Mexico	Puebla	Eloxochitlán	Xonotipan de Juárez, Carr. Azumbilla-Tlacotepec de Díaz	777	18.4917	-96.8972	MG944586	a	MG944480	a	MG944667	a
44	CRVA_1973	H. flesichmanni	Guatemala	izabal	morales	sierra caral		15.4033	-88.6994	MG944587	a	MG944481	a	MG944668	a
45	CRVA_1974	H. flesichmanni	Guatemala	izabal	morales	sierra caral		15.4033	-88.6994	MG944588	a	MG944482	a	MG944669	a
46	CRVA_2017	H. flesichmanni	Guatemala	baja verapaz	purulha	rio el cafetal		15.2008	-90.2053	MG944589	a	MG944483	a	---	---
47	CRVA_2018	H. flesichmanni	Guatemala	baja verapaz	purulha	rio el cafetal		15.2008	-90.2053	MG944590	a	MG944484	a	---	---
48	CRVA_2758	H. flesichmanni	Guatemala	alta verapaz	senahu	Chicuc, rio		15.4912	-89.6315	---	---	MG944485	a	---	---
49	CRVA_2759	H. flesichmanni	Guatemala	alta verapaz	senahu	Chicuc, rio		15.4912	-89.6315	MG944591	a	MG944486	a	MG944670	a
50	CRVA_2760	H. flesichmanni	Guatemala	alta verapaz	senahu	Chicuc, rio		15.4912	-89.6315	MG944592	a	MG944487	a	MG944671	a
51	CRVA_2767	H. flesichmanni	Guatemala	alta verapaz	senahu	Rio Seococ		15.4805	-89.6565	MG944593	a	MG944488	a	---	---
52	CRVA_3166	H. flesichmanni	Guatemala	alta verapaz	senahu	searranx		15.5203	-89.6176	MG944594	a	MG944489	a	---	---
53	CRVA_3167	H. flesichmanni	Guatemala	alta verapaz	senahu	searranx		15.5203	-89.6176	MG944595	a	MG944490	a	MG944672	a
54	CRVA_3194	H. flesichmanni	Guatemala	izabal	morales	sierra caral		15.4033	-88.6994	MG944596	a	MG944491	a	---	---
55	CRVA_3467	H. flesichmanni	Guatemala	izabal	livingston	aldea sahila, sierra santa cruz		15.7007	-89.1588	MG944597	a	MG944492	a	---	---
56	AMMH_121	H. flesichmanni	Mexico	Chiapas	Ocosingo	Naha	950	16.99	-91.58	MG944598	a	MG944493	a	MG944673	a
57	AMMH_122	H. flesichmanni	Mexico	Chiapas	Ocosingo	Naha	950	16.99	-91.58	MG944599	a	MG944494	a	MG944674	a
58	AMMH_136	H. flesichmanni	Mexico	Chiapas	Ocosingo	Naha	950	16.99	-91.58	MG944600	a	MG944495	a	---	---
59	AMMH_137	H. flesichmanni	Mexico	Chiapas	Ocosingo	Naha	950	16.99	-91.58	---	---	MG944496	a	MG944675	a
60	IAvH_Am_10258	H. flesichmanni	Colombia	Santander	Rionegro	Corregimiento Llano de Palmas, Vereda La Honda, Club Rinos, Los Baicales, quebrada Abreo Malpaso		7.25363	-73.2368	MG944601	a	MG944497	a	MG944676	a
61	JAC_25612	H. flesichmanni	Mexico	Guerrero	Atoyac de Álvarez	San Vicente de Benitez	879	17.2443	-100.244	MG944602	a	MG944498	a	---	---
62	UF_144716	H. flesichmanni	Honduras	Cortés		El Paraiso Valley 180 m	180	15.65	-88.1	---	---	MG944499	a	---	---
63	UF_144717	H. flesichmanni	Honduras	Cortés		El Paraiso Valley 180 m	180	15.65	-88.1	---	---	MG944500	a	---	---
64	JHT_2587	H. flesichmanni	Honduras	Santa Bárbara		Compañia Agrícola Paradise (former Plowden Finca)		14.9476	-88.0463	---	---	MG944501	a	---	---
65	USNM_578701	H. flesichmanni	Honduras	Yoro		San Jose de Texiguat		15.4833	-87.4333	---	---	MG944502	a	---	---
66	USNM_578702	H. flesichmanni	Honduras	Yoro		San Jose de Texiguat		15.4833	-87.4333	---	---	MG944503	a	---	---
67	JHT_4034	H. flesichmanni	Nicaragua	Jinotega		Reserva Silvestre El Jaguar		13.238	-86.053	---	---	MG944504	a	---	---
68	MZFC_15718	H. flesichmanni	Mexico	Oaxaca		7.5 km W Jalapa de Diaz, Hwy 150 W of Tuxtepec	338	18.044	-96.5792	MG944603	a	MG944505	a	---	---
69	MZFC_15717	H. flesichmanni	Mexico	Oaxaca		13.1 km W Jalapa de Diaz, Hwy 150 W of Tuxtepec	359	18.0533	-96.6195	MG944604	a	MG944506	a	---	---
70	MZFC_15719	H. flesichmanni	Mexico	Oaxaca		13.1 km W Jalapa de Diaz, Hwy 150 W of Tuxtepec	359	18.0533	-96.6195	MG944605	a	MG944507	a	---	---
71	MZFC_20509	H. flesichmanni	Mexico	Puebla	Eloxochitlan	Ejido Tepequezquiapan, Carr. Eloxochitlan-Tlacotepec de Diaz	1041	18.4862	-96.916	MG944606	a	MG944508	a	MG944677	a
72	MZFC_5227	H. flesichmanni	Mexico	Oaxaca	Sierra de Juárez	12-15 rd km W Jalapa de Díaz	400	18.0596	-96.5495	MG944607	a	MG944509	a	---	---
73	MZFC_5228	H. flesichmanni	Mexico	Oaxaca	Sierra de Juárez	12-15 rd km W Jalapa de Díaz	400	18.0596	-96.5495	---	---	MG944510	a	MG944678	a
74	MZFC_5229	H. flesichmanni	Mexico	Oaxaca	Sierra de Juárez	12-15 rd km W Jalapa de Díaz	400	18.0596	-96.5495	MG944608	a	MG944511	a	---	---
75	MZFC_5230	H. flesichmanni	Mexico	Oaxaca	Sierra de Juárez	12-15 rd km W Jalapa de Díaz	400	18.0596	-96.5495	MG944609	a	MG944512	a	---	---
76	KRL_1115	H. flesichmanni	Panama	Cocle	El Cope	Barrigon		8.667	-80.592	KR863261	d	KR863006	d	---	---
77	KRL_1126	H. flesichmanni	Panama	Cocle	El Cope	Barrigon		8.667	-80.592	KR863262	d	KR863007	d	---	---
78	KRL_1316	H. flesichmanni	Panama	Cocle	El Cope			8.667	-80.592	KR863263	d	KR863008	d	---	---
79	MHNLS_17174	H. tatayoi	Venezuela	Zulia		El Tocuco		9.84183	-72.8204	EU663055	e	MG944513	a	EU663150	e
80	MHNLS_17183	H. tatayoi	Venezuela	Zulia		El Tocuco		9.84183	-72.8204	GQ142047	b	MG944514	a	MG944679	a
81	MHUA_A_04347	H. flesichmanni	Colombia	Antioquia	Maceo	Las Brisas, Hda. Sta. Barbara	510	6.5469	-74.6436	MG944610	a	MG944515	a	MG944680	a
82	MHUA_A_04352	H. flesichmanni	Colombia	Antioquia	Maceo	Las Brisas, Hda. Sta. Barbara	510	6.5469	-74.6436	MG944611	a	MG944516	a	---	---
83	MHUA_A_04882	H. flesichmanni	Colombia	Antioquia	Maceo	Las Brisas, Hda. Sta. Barbara	510	6.5469	-74.6436	MG944612	a	MG944517	a	---	---
84	MHUA_A_05805	H. flesichmanni	Colombia	Antioquia	Gomez Plata	La Clara, Hda. Vegas de La Clara U de A	1093	6.58472	-75.1989	MG944613	a	MG944518	a	---	---
85	MHUA_A_05806	H. flesichmanni	Colombia	Antioquia	Gomez Plata	La Clara, Hda. Vegas de La Clara U de A	1093	6.58472	-75.1989	MG944614	a	---	---	---	---
86	MHUA_A_07143	H. flesichmanni	Colombia	Antioquia	Gomez Plata	La Clara, Hacienda Vegas de La Clara U de A.	1080	6.58472	-75.1989	MG944615	a	MG944519	a	MG944681	a
87	MHUA_A_07198	H. flesichmanni	Colombia	Antioquia	San Carlos	Juanes, Casino Viejo	680	6.21734	-74.8126	MG944616	a	MG944520	a	MG944682	a
88	MHUA_A_07522	H. flesichmanni	Colombia	Antioquia	Taraza	Rayo, Bosque ripario Rio Rayo	230	7.50935	-75.3746	MG944617	a	MG944521	a	---	---
89	MHUA_A_07659	H. flesichmanni	Colombia	Antioquia	San Carlos	Puerto Garza, Limones, Deposito proyecto Porvenir II	320	6.07906	-74.826	MG944618	a	MG944522	a	MG944683	a
90	MHUA_A_08167	H. flesichmanni	Colombia	Antioquia	Gomez Plata	Hacienda Vegas de la Clara	1103	6.58151	-75.1976	MG944619	a	MG944523	a	MG944684	a
91	MHUA_A_08405	H. flesichmanni	Colombia	Antioquia	Sonson	San Miguel, Parcelas, San Antonio	300	5.83361	-74.7692	MG944620	a	MG944524	a	MG944685	a
92	MHUA_A_08406	H. flesichmanni	Colombia	Antioquia	Sonson	San Miguel, Parcelas, San Antonio	300	5.83361	-74.7692	MG944621	a	MG944525	a	MG944686	a
93	MHUA_A_08420	H. flesichmanni	Colombia	Antioquia	Sonson	San Miguel, Parcelas, San Antonio	300	5.83361	-74.7692	MG944622	a	MG944526	a	MG944687	a
94	MHUA_A_08529	H. flesichmanni	Colombia	Antioquia	Anori	Liberia, Casa de Maquinas campamento mineros providencia	327	7.31676	-75.0548	MG944623	a	MG944527	a	---	---
95	MHUA_A_09379	H. flesichmanni	Colombia	Choco	Acandi	Capurgana, El Longo	50	8.61546	-77.3396	MG944624	a	MG944528	a	MG944688	a
96	MHUA_A_09383	H. flesichmanni	Colombia	Choco	Acandi	Capurgana, El Longo	50	8.61546	-77.3396	MG944625	a	MG944529	a	MG944689	a
97	MHUA_A_09749	H. flesichmanni	Colombia	Antioquia	San Rafael	La Granja,	918	6.28287	-74.9249	MG944626	a	MG944530	a	MG944690	a
98	MHUA_A_10139	H. flesichmanni	Colombia	Santander	Giron	Villa Leiva, Quedrada Villa Leiva	360	7.09286	-73.3204	MG944627	a	MG944531	a	MG944691	a
99	MHUA_A_10361	H. flesichmanni	Colombia	Choco	Acandi	Capurgana, , Camino al Cielo	50	8.62149	-77.363	MG944628	a	MG944532	a	---	---
100	MVZ_149768	H. flesichmanni	Costa Rica	Puntarenas		town of Monteverde		10.3	-84.8167	---	---	---	---	AY819468	g
101	MVZ_149992	H. flesichmanni	Costa Rica	San Jose		Parque Bolivar, San Jose		9.93333	-84.0833	MG944629	a	MG944533	a	---	---
102	MVZ_203787	H. flesichmanni	Costa Rica	Cartago		Oropendola Trail, 4.1 km S Tapanti Bridge over Rio Grande de Orosi on main road through Refugio Nacional Tapanti		9.73043	-84.0833	MG944630	a	MG944534	a	---	---
103	MVZ_203788	H. flesichmanni	Costa Rica	Cartago		Oropendola Trail, 4.1 km S Tapanti Bridge over Rio Grande de Orosi on main road through Refugio Nacional Tapanti		9.73043	-84.0833	MG944631	a	MG944535	a	---	---
104	MVZ_203789	H. flesichmanni	Costa Rica	Cartago		Oropendola Trail, 4.1 km S Tapanti Bridge over Rio Grande de Orosi on main road through Refugio Nacional Tapanti		9.73043	-84.0833	MG944632	a	MG944536	a	---	---
105	MVZ_207146	H. flesichmanni	Costa Rica	Guanacaste		trail from Casa Mengo to Casa Frank, first stream N of summit of trail, Volcan Cacao	1611	10.9333	-85.45	JX564869	f	JX564869	f	JX564869	f
106	UF_156081	H. flesichmanni	Nicaragua	Region Autonoma Atlantico Norte		Parque Nacional Saslaya: Campamento El Toro, 1340 m	340	13.7133	-84.9617	---	---	MG944537	a	---	---
107	MZFC_22561	H. flesichmanni	Mexico	Oaxaca	Pluma Hidalgo	Municipio de Pluma Hidalgo; Río Juquilita	516	15.9024	-96.453	MG944633	a	MG944538	a	MG944692	a
108	QCAZ_22303	H. flesichmanni	Ecuador	Esmeraldas		La Tola	93	0.404167	-79.9114	EU663044	e	---	---	EU663136	e
109	RLR_915	H. flesichmanni	Mexico	Chiapas	Osumacinta	A 500 m al SE de Agua Fría	1215	16.5116	-93.015	MG944634	a	MG944539	a	---	---
110	RVG_153	H. flesichmanni	Mexico	Oaxaca	San Felipe Jalapa de Díaz	"Sección Santiago"	268	18.0699	-96.5354	MG944635	a	MG944540	a	---	---
111	MZFC_29008	H. flesichmanni	Mexico	Oaxaca	San Jerónimo Tecoatl	Entre El Edén y La Esperanza, Río Petlapa	1427	18.149	-96.9091	MG944636	a	MG944541	a	---	---
112	MZFC_29010	H. flesichmanni	Mexico	Oaxaca	San Felipe Jalapa de Díaz	Cerro Rabón	507	18.0699	-96.5644	MG944637	a	MG944542	a	---	---
113	MZFC_29011	H. flesichmanni	Mexico	Oaxaca	Santa María Chilchotla	Ejido Clemencia	1189	18.2393	-96.7875	MG944638	a	MG944543	a	---	---
114	SMF_82882	H. flesichmanni	Nicaragua	Atlantico Norte		Parque Nacional Saslaya, near Campamento "El Carao"	1340	13.7133	-84.9617	JN870860	c	---	---	---	---
115	SMNF_82878	H. flesichmanni	Nicaragua	Atlantico Norte		Parque Nacional Saslaya: El Padre:	340	13.7133	-84.9617	GQ142048	b	---	---	---	---
116	MZFC_21498	H. flesichmanni	Mexico	Puebla	Eloxochitlan	Ejido Tepequezquiapan, Carr. Eloxochitlan-Tlacotepec de Diaz	1041	18.4862	-96.916	MG944639	a	MG944544	a	MG944693	a
117	MZFC_21950	H. flesichmanni	Mexico	Puebla	Eloxochitlan	Ejido Tepequezquiapan, Carr. Eloxochitlan-Tlacotepec de Diaz	1041	18.4862	-96.916	---	---	MG944545	a	---	---
118	UOGV_1560	H. flesichmanni	Mexico	Oaxaca	Sierra Mazateca	Puente de Fierro		18.1537	-96.8528	---	---	MG944546	a	---	---
119	UOGV_1573	H. flesichmanni	Mexico	Oaxaca	Sierra Mazateca	Puente de Fierro		18.1537	-96.8528	MG944640	a	MG944547	a	MG944694	a
120	MZFC_28393	H. flesichmanni	Mexico	Veracruz	Las Choapas	Ejido Piedritas		17.5506	-94.1399	MG944641	a	MG944548	a	---	---
121	UOGV_793	H. flesichmanni	Mexico	Guerrero	Atoyac de Álvarez	San Vicente de Benitez, en las orillas del río		17.2913	-100.281	MG944642	a	MG944549	a	---	---
122	USNM_559092	H. flesichmanni	Honduras	Gracias a Dios		Rus Rus Biological Reserve	60	14.7169	-84.45	EU663045	e	---	---	EU663137	e
123	UTCH_2409	H. flesichmanni	Colombia	Choco	Lloró	La granja, UTCH	112	5.51035	-76.5548	MG944643	a	MG944550	a	MG944695	a

## Sheet: Sources
Code	Reference
a	this study
b	Castroviejo-Fisher, S., Padial, J. M., Chaparro, J. C., Aguayo, R., & De la Riva, I. (2009). A new species of Hyalinobatrachium (Anura: Centrolenidae) from the Amazonian slopes of the central Andes with comments on the diversity of the genus in the area. Zootaxa, (2143), 24-44.
c	Castroviejo-Fisher, S., Vila, C., Ayarzagueena, J., Blanc, M., & Ernst, R. (2011). Species diversity of Hyalinobatrachium glassfrogs (Amphibia: Centrolenidae) from the Guiana Shield, with the description of two new species. Zootaxa, 3132(1), 1-55.
d	Paz, A., Ibáñez, R., Lips, K. R., & Crawford, A. J. (2015). Testing the role of ecology and life history in structuring genetic variation across a landscape: a trait‐based phylogeographic approach. Molecular ecology, 24(14), 3723-3737.
e	Guayasamin, J. M., Castroviejo-Fisher, S., Ayarzagüena, J., Trueb, L., & Vilà, C. (2008). Phylogenetic relationships of glassfrogs (Centrolenidae) based on mitochondrial and nuclear genes. Molecular Phylogenetics and Evolution, 48(2), 574-595.
f	Zhang, P., Liang, D., Mao, R. L., Hillis, D. M., Wake, D. B., & Cannatella, D. C. (2013). Efficient sequencing of anuran mtDNAs and a mitogenomic exploration of the phylogeny and evolution of frogs. Molecular Biology and Evolution, 30(8), 1899-1915.
g	Wiens, J. J., Fetzner Jr, J. W., Parkinson, C. L., & Reeder, T. W. (2005). Hylid frog phylogeny and sampling strategies for speciose clades. Systematic Biology, 54(5), 778-807.
